# Supplementary material
Source: PubMed Central journal article supplement (PMC8012169)
Supplement: mmc2.pdf [file mmc2.pdf]

|                           | Covid-19 ICU non-CIN/CIM matched<br>(n=7) | <i>P</i> |
|---------------------------|-------------------------------------------|----------|
| Gender, <i>male</i> n (%) | 6 (86)                                    | 0,16     |
| Age, <i>yrs</i>           | 51 (46-58)                                | 0,12     |
| BMI                       | 33 (29-39)                                | 0,79     |
| ACEi/ARB treatment (%)    | 2 (29)                                    | 0,47     |
| Comorbidities, n (%)      |                                           |          |
| Pulmonary disease         | 1 (14)                                    | 0,83     |
| Hypertension              | 2 (29)                                    | 0,14     |
| Heart failure             | 0 (0)                                     | 0,14     |
| Peripheral vessel disease | 1 (14)                                    | 0,51     |
| Diabetes mellitus         | 3 (43)                                    | 0,78     |
| Neurological disease      | 1 (14)                                    | 0,16     |
| Malignancy                | 0 (0)                                     | 1        |

**Supplementary table 1.** Demographics for 7 intubated COVID-19 patients treated > 12 days in the intensive care unit (ICU) who did not develop critical illness neuropathy or myopathy (CIN/CIM) and from whom plasma samples were analysed for neurofilament light chain (NFL), tau and glial fibrillary acidic protein (GFAP). ACEi – Angiotensin Converting Enzyme inhibitor; ARB – Angiotensin Receptor Blocker. Values are represented as median (IQR) or n (%). The p-value originates from comparisons with CIN/CIM-group using the Mann-Whitney U test for continuous parameters and the chi-square test for categorical parameters. Values are represented as median (IQR) or n (%).

|                                          | <i>n</i> | Covid-19 ICU CIN/CIM<br>matched | <i>P</i> |
|------------------------------------------|----------|---------------------------------|----------|
| <b>On admission</b>                      |          |                                 |          |
| SAPS                                     | 7        | 49 (48-54)                      | 0.96     |
| Respiratory rate (breaths per minute)    | 7        | 28 (22-32)                      | 0.48     |
| Mean arterial blood pressure (mmHg)      | 7        | 86 (82-94)                      | 0.89     |
| Heart rate (beats per minute)            | 7        | 93 (90-102)                     | 0.50     |
| Body temperature (degrees Celsius)       | 7        | 38.4 (37.4-39.0)                | 0.75     |
| Days with COVID-19                       | 7        | 10 (10-11)                      | 0.34     |
| <b>In the ICU</b>                        |          |                                 |          |
| Length of stay                           | 7        | 18 (17-21)                      | 0.13     |
| Thromboembolic events                    | 7        | 2 (33)                          | 0.47     |
| Invasive ventilation (%)                 | 7        | 7(100)                          | 1        |
| Invasive ventilation free days           | 7        | 18 (17-19)                      | <0.001   |
| Vasoactive medication (%)                | 7        | 7 (100)                         | 1        |
| Vasoactive medication free days          | 7        | 20 (18-22)                      | 0.03     |
| Renal replacement therapy (RRT, %)       | 7        | 1 (14)                          | 0.03     |
| RRT free days                            | 1        | 21 (21-21)                      | 1        |
| Continuous propofol anaesthesia (%)      | 7        | 7 (100)                         | 1        |
| Propofol anaesthesia free days           | 7        | 16 (15-17)                      | 0.08     |
| Iv Opioid analgesia (%)                  | 7        | 7 (100)                         | 1        |
| Iv Opioid analgesia free days            | 7        | 14 (8-17)                       | 0.06     |
| Continuous iv neuromuscular blockade (%) | 7        | 7 (100)                         | 1        |
| Iv neuromuscular blockade free days      | 7        | 24 (20-26)                      | 0.10     |
| ICU-mortality (%)                        | 7        | 0 (0)                           | 0.07     |
| 30-day mortality (%)                     | 7        | 0 (0)                           | 0.15     |

**Supplementary table 2. Clinical data for 7 intubated COVID-19 patients treated > 12 days in the intensive care unit (ICU) who did not develop critical illness neuropathy or myopathy (CIN/CIM) and from whom plasma samples were analysed for neurofilament light chain (NFL), tau and glial fibrillary acidic protein (GFAP).** Opioid analgesia includes morphine, oxycodone, remifentanil and/or fentanyl. Neuromuscular blockade includes rocuronium or atracurium. Values are represented as median (IQR) or n (%). The p-value originates from comparisons with CIN/CIM-group using the Mann-Whitney U test for continuous parameters and the chi-square test for categorical parameters. Values are represented as median (IQR) or n (%).
